# Supplementary material for: Fabrication of a ZnO nanocolumnar thin film on a glass slide and its reversible switching from a superhydrophobic to a superhydrophilic state
Source: Royal Society of Chemistry journal article supplement (doi:10.1039/c3ra40312b), 2013-01-01
Supplement: c3ra40312b.pdf [file c3ra40312b.pdf]

## **Supporting Online Materials**

### **Fabrication of ZnO nanocolumnar thin film on glass slide and its reversible switching from superhydrophobic state to superhydrophilic state**

**Chanchal Mondal,<sup>a</sup> Mainak Ganguly,<sup>a</sup> Arun Kumar Sinha,<sup>a</sup> Jaya Pal<sup>a</sup> and Tarasankar Pal<sup>\*a</sup>**  
Department of Chemistry,

Indian Institute of Technology, Kharagpur-721302, India

E-mail: tpal@chem.iitkgp.ernet.in

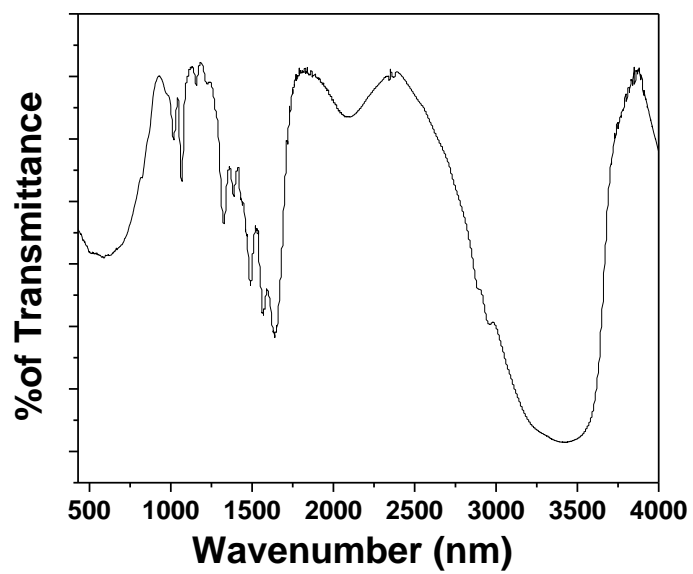

**Figure S1: FTIR spectrum of ethanol amine**

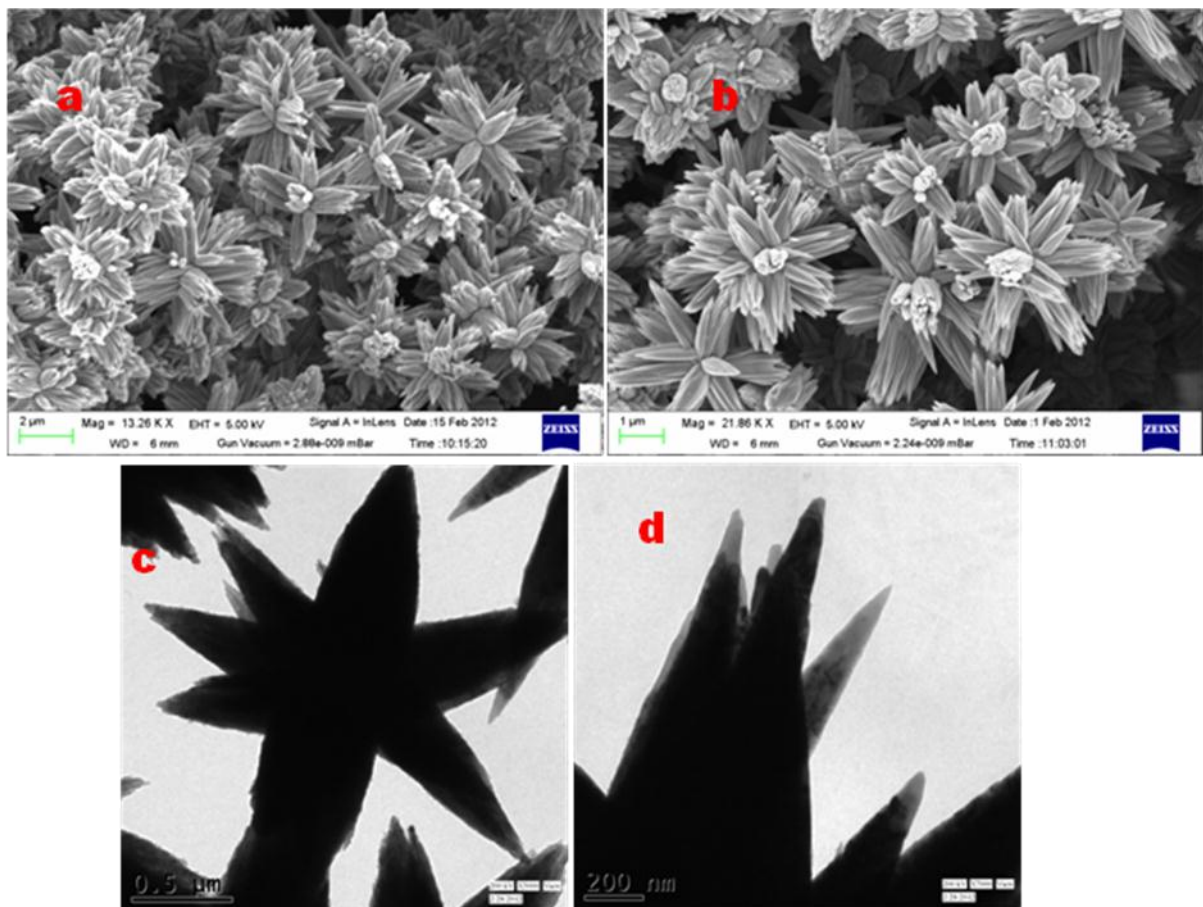

**Figure S2: FESEM images of ZnO nanoflower at different magnification(a, b); TEM image of a single ZnO nanoflower (c); tips of that nanoflower (d)**

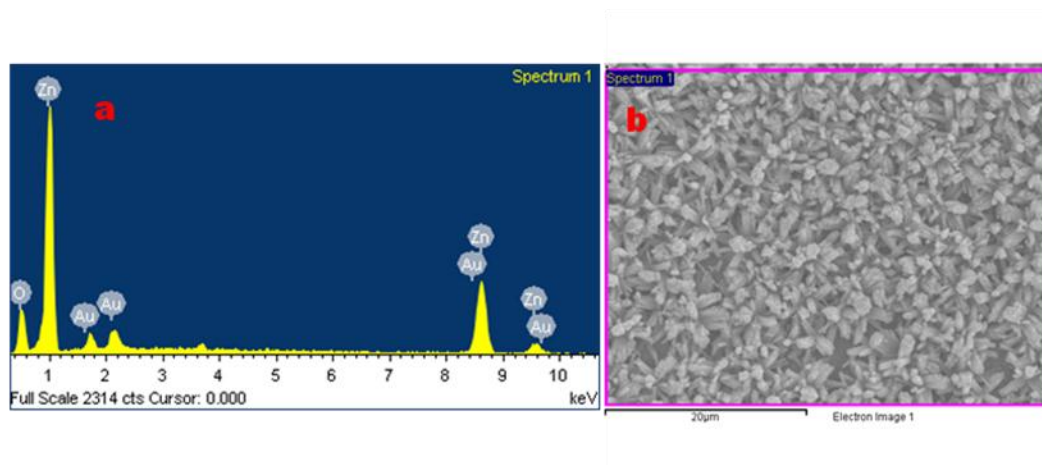

**Figure S3: EDS spectrum of ZnO nanocolumn (a) and its corresponding scan area (b)**

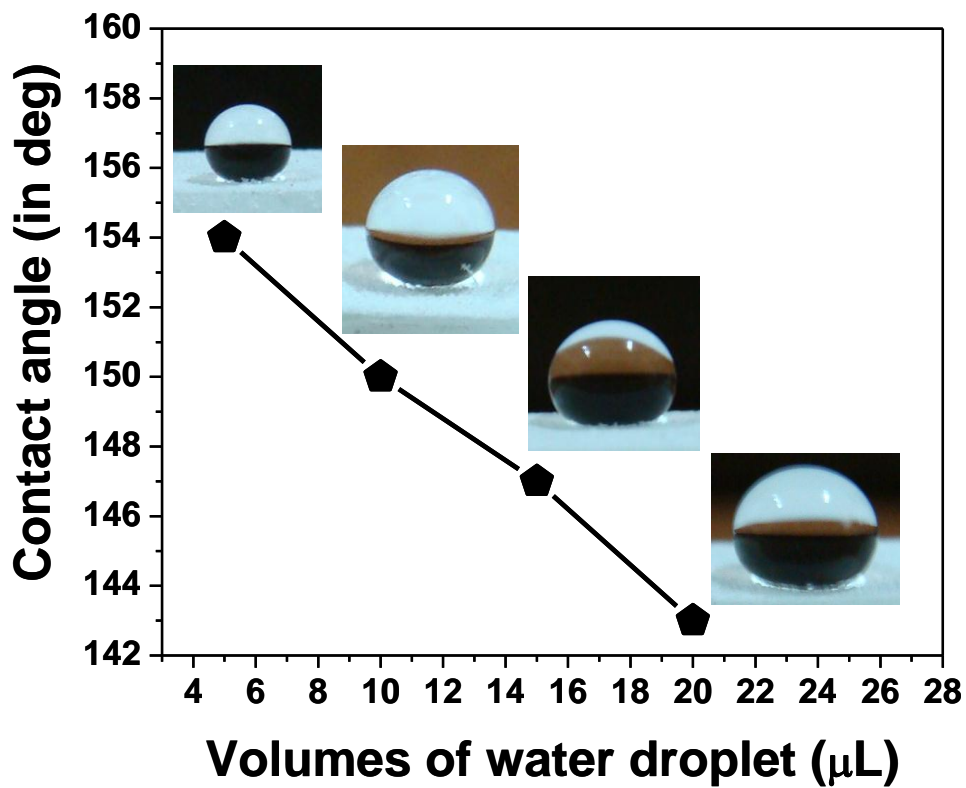

Figure S4 : Variation of water contact angle with different volumes of water
